# Supplementary material for: Development of cancer-associated fibroblast-related gene signature for predicting the survival and immunotherapy response in lung adenocarcinoma
Source: publisher site journal article supplement (doi:10.18632/aging.204774), 2023-06-06
Supplement: Supplementary file [file aging-v15i11-204774-supplementary-material-SD1.pdf]

**SUPPLEMENTARY FIGURES**

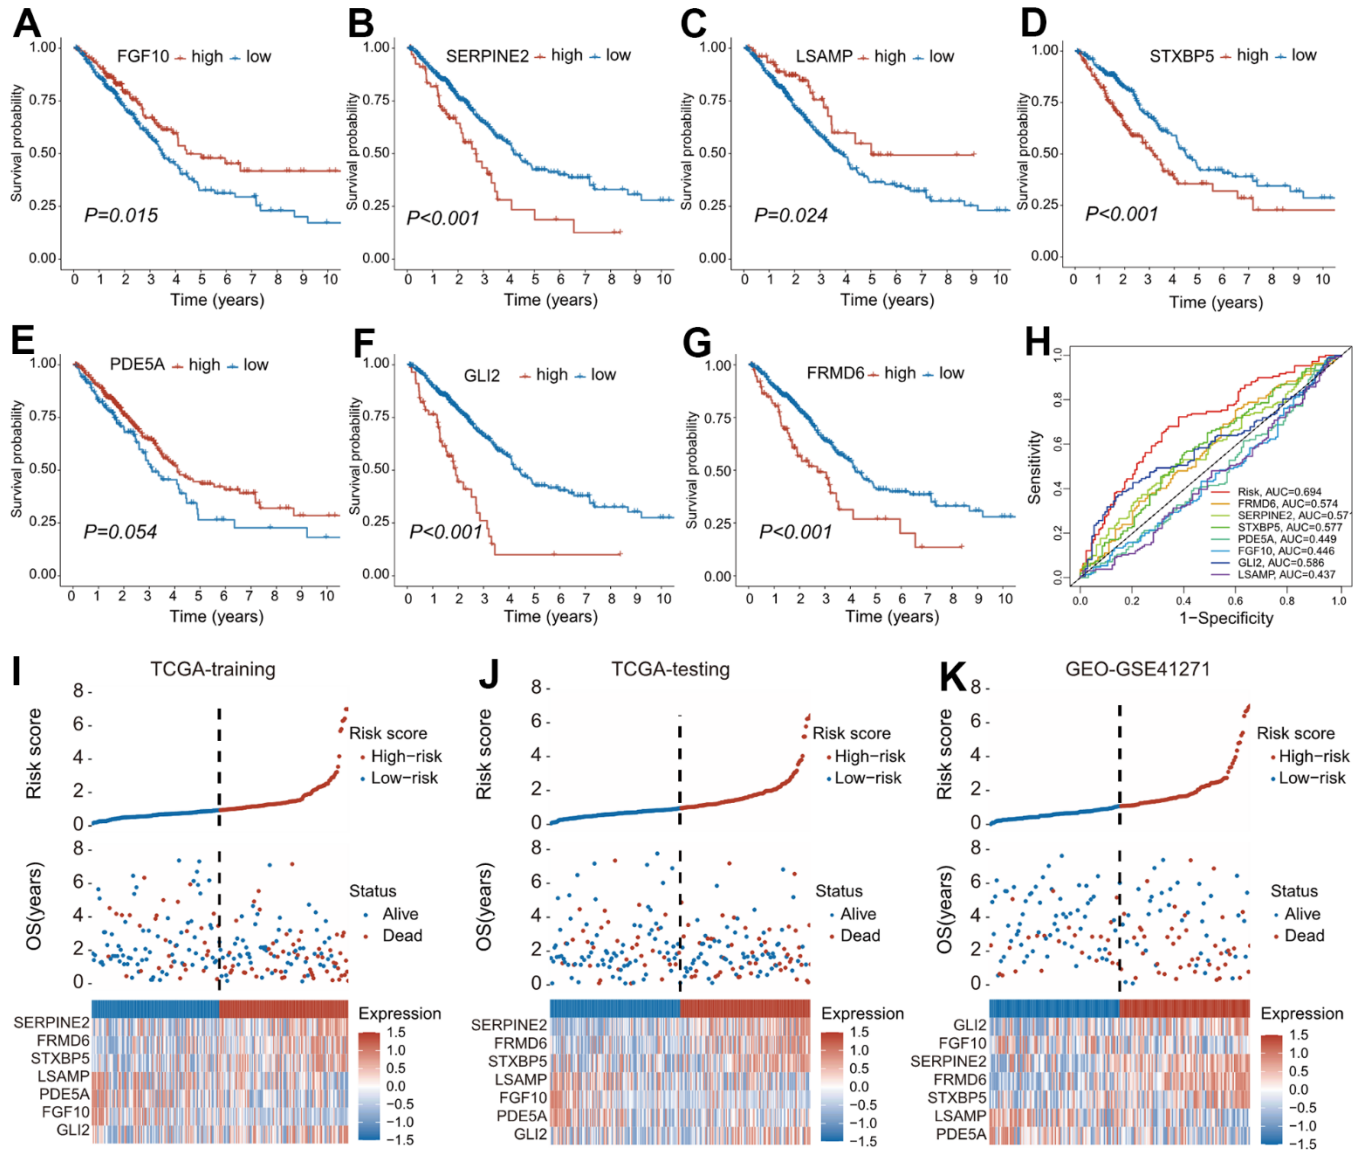

**Supplementary Figure 1. The predictive performance of the model and seven composing genes. (A–G)** Kaplan-Meier curves of patients stratified by expression profiling of 7 genes composing the CAFRS **(H)** Receiver operating characteristic (ROC) curves illustrating AUC values of 7 genes composing CAFRS at 3-year. **(I–K)** Distributions of survival status, risk score and expression profiles among patients from TCGA training, TCGA testing and GEO cohorts.

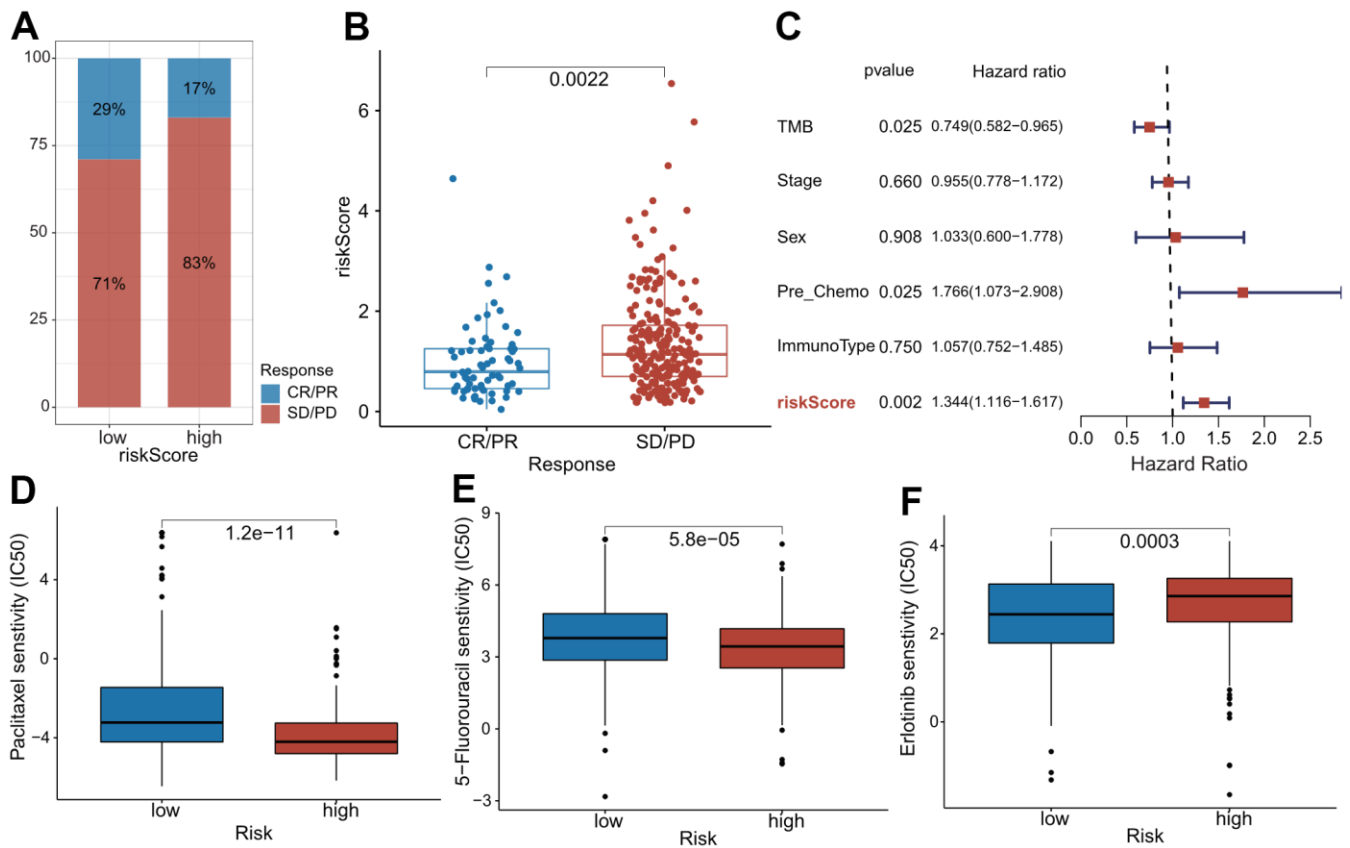

**Supplementary Figure 2. The role of CAFRS in predicting the therapeutic response to drug therapy.** (A) The proportion of patients with clinical response to anti-PD-1 immunotherapy in low- and high-risk subgroup from IMvigor210 cohort. SD, stable disease; PD, progressive disease; CR, complete response; PR, partial response. (B) Riskscores calculated by CAFRS in the CR+PR and SD+PD subgroups. (C) The forest plot of multivariate Cox regression for combined riskscore and clinical variables in IMvigor210 cohort. (D-F) Variations of responses to Paclitaxel, Erlotinib, 5-FU between low- and high-risk subgroups, respectively.
